# Supplementary material
Source: publisher figshare collection journal article supplement (https://acs.figshare.com/ndownloader/files/4671289)
Supplement: Supplementary file 1 [file 4671289]

## **SUPPORTING INFORMATION**

Supplemental Figure 1. Sequence alignment of proteins identified through BLAST to be similar to *M/HMPDdc*. Strictly conserved residues are highlighted in red while less strictly conserved residues are shown in red font. The secondary structure for HMPDdc is shown above the alignment.

Supplemental Figure 2. Sequence alignment of decarboxylase proteins identified through BLAST with HMPDdc and the aldolase submitted to BLAST. Strictly conserved residues are highlighted in red and less strictly conserved residues are shown in red font. The secondary structure of HMPDdc is shown above the alignment.

MHPDdc [Mesorhizobium loti\_MAPP

MHPDdc [Mesorhizobium loti\_MAPP  
aldolase/adducin [Polynucleobac  
aldolase/adducin-like [Burkhold  
aldolase/Pseudomonas entomophi  
aldolase/adducin [Hypocmonas ne  
aldolase/adducin [Bradyrhizobi  
putative aldolase [Bradyrhizobi  
possible ribulose-5-phosphate  
N-methylhydantoinaseB/acetone  
possible aldolase [Aurantimonas  
hypBC1G 11697 [Botryotinia fuck  
hypSNOG 06501 [Phaeosphaeria no  
SNOG 00416 [Phaeosphaeria nodor  
aldolase/adducin [Desulfitobact  
aldolase/adducin [Nocardioide

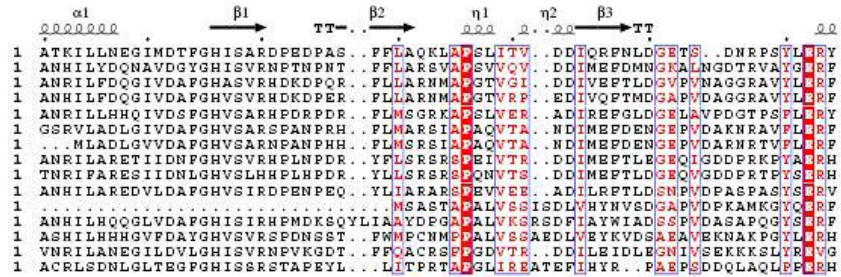

MHPDdc [Mesorhizobium loti\_MAPP

MHPDdc [Mesorhizobium loti\_MAPP  
aldolase/adducin [Polynucleobac  
aldolase/adducin-like [Burkhold  
aldolase/Pseudomonas entomophi  
aldolase/adducin [Hypocmonas ne  
aldolase/adducin [Bradyrhizobi  
putative aldolase [Bradyrhizobi  
possible ribulose-5-phosphate  
N-methylhydantoinaseB/acetone  
possible aldolase [Aurantimonas  
hypBC1G 11697 [Botryotinia fuck  
hypSNOG 06501 [Phaeosphaeria no  
SNOG 00416 [Phaeosphaeria nodor  
aldolase/adducin [Desulfitobact  
aldolase/adducin [Nocardioide

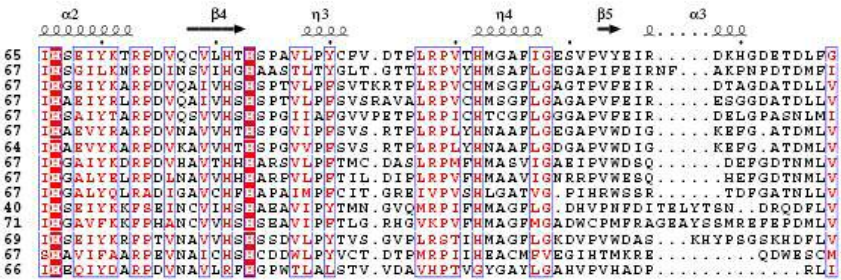

MHPDdc [Mesorhizobium loti\_MAPP

MHPDdc [Mesorhizobium loti\_MAPP  
aldolase/adducin [Polynucleobac  
aldolase/adducin-like [Burkhold  
aldolase/Pseudomonas entomophi  
aldolase/adducin [Hypocmonas ne  
aldolase/adducin [Bradyrhizobi  
putative aldolase [Bradyrhizobi  
possible ribulose-5-phosphate  
N-methylhydantoinaseB/acetone  
possible aldolase [Aurantimonas  
hypBC1G 11697 [Botryotinia fuck  
hypSNOG 06501 [Phaeosphaeria no  
SNOG 00416 [Phaeosphaeria nodor  
aldolase/adducin [Desulfitobact  
aldolase/adducin [Nocardioide

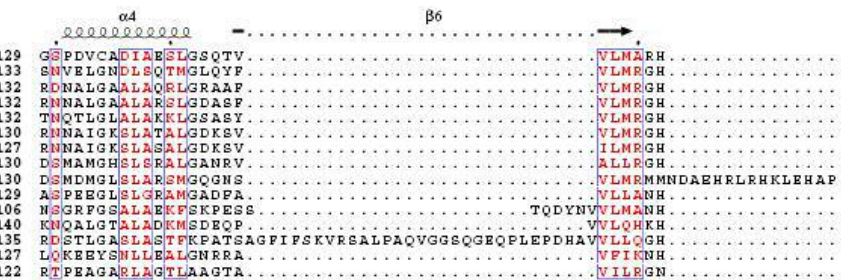

MHPDdc [Mesorhizobium loti\_MAPP

MHPDdc [Mesorhizobium loti\_MAPP  
aldolase/adducin [Polynucleobac  
aldolase/adducin-like [Burkhold  
aldolase/Pseudomonas entomophi  
aldolase/adducin [Hypocmonas ne  
aldolase/adducin [Bradyrhizobi  
putative aldolase [Bradyrhizobi  
possible ribulose-5-phosphate  
N-methylhydantoinaseB/acetone  
possible aldolase [Aurantimonas  
hypBC1G 11697 [Botryotinia fuck  
hypSNOG 06501 [Phaeosphaeria no  
SNOG 00416 [Phaeosphaeria nodor  
aldolase/adducin [Desulfitobact  
aldolase/adducin [Nocardioide

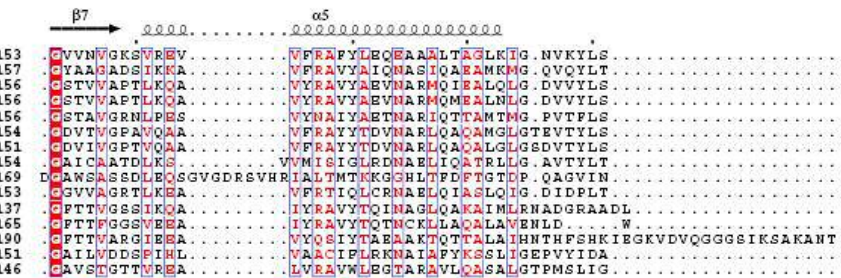

MHPDdc [Mesorhizobium loti\_MAPP

MHPDdc [Mesorhizobium loti\_MAPP  
aldolase/adducin [Polynucleobac  
aldolase/adducin-like [Burkhold  
aldolase/Pseudomonas entomophi  
aldolase/adducin [Hypocmonas ne  
aldolase/adducin [Bradyrhizobi  
putative aldolase [Bradyrhizobi  
possible ribulose-5-phosphate  
N-methylhydantoinaseB/acetone  
possible aldolase [Aurantimonas  
hypBC1G 11697 [Botryotinia fuck  
hypSNOG 06501 [Phaeosphaeria no  
SNOG 00416 [Phaeosphaeria nodor  
aldolase/adducin [Desulfitobact  
aldolase/adducin [Nocardioide

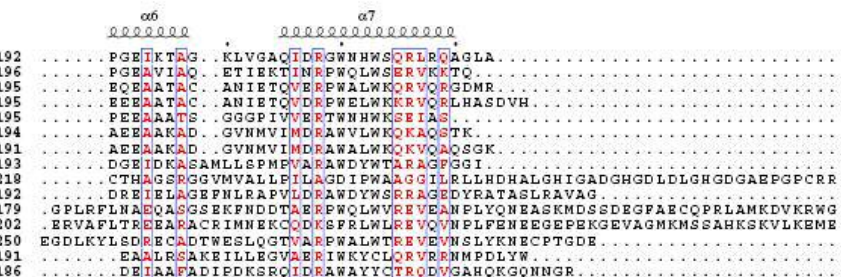

Supplemental Figure 1

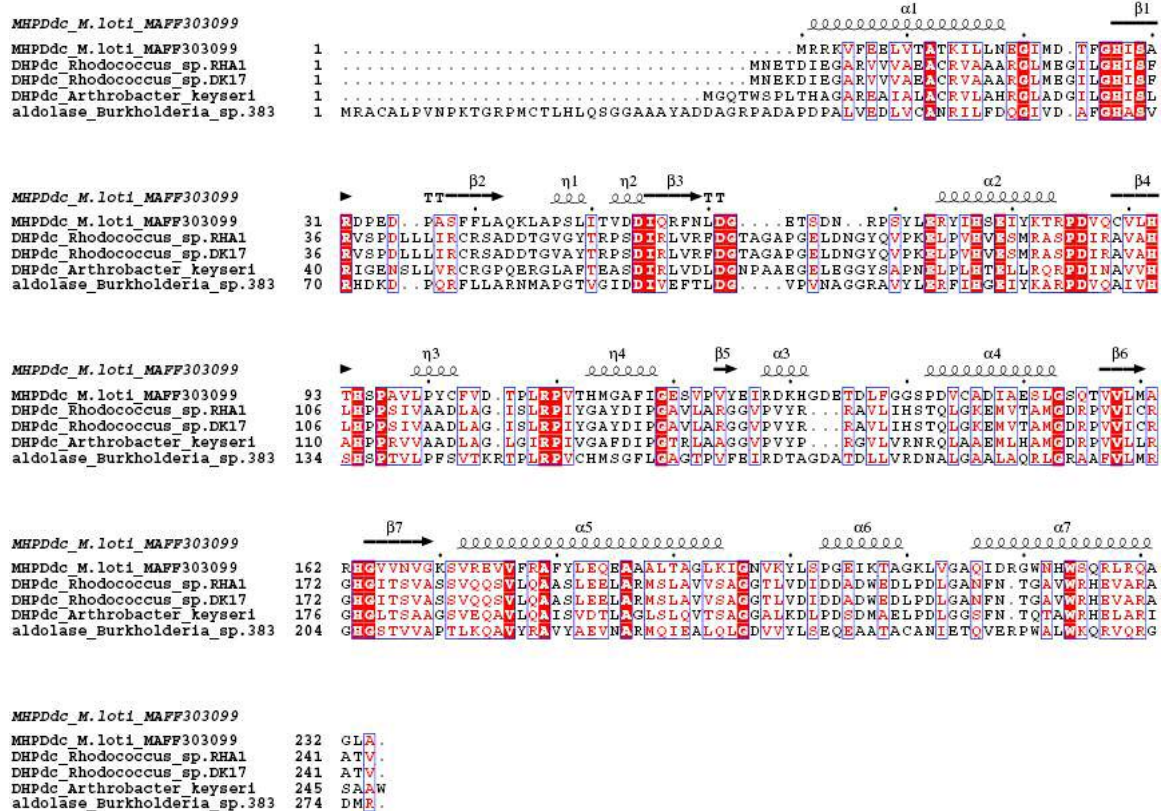

Supplemental Figure 2
